# Supplementary material
Source: PubMed Central journal article supplement (PMC4863574)

Figure S1

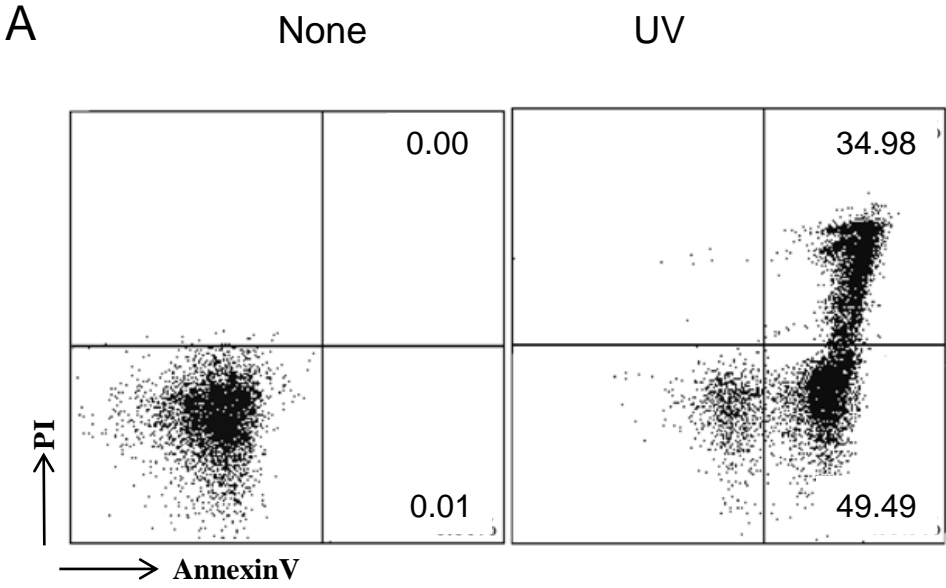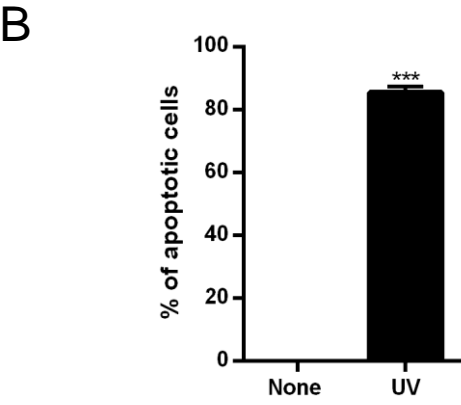

Figure S2

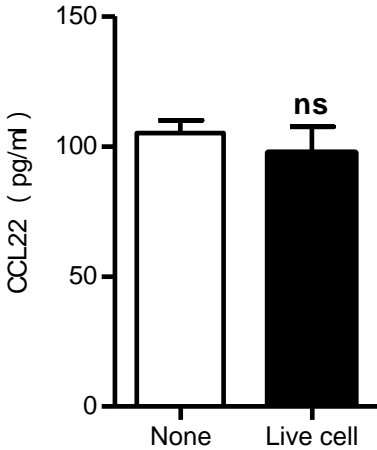

Figure S3

A

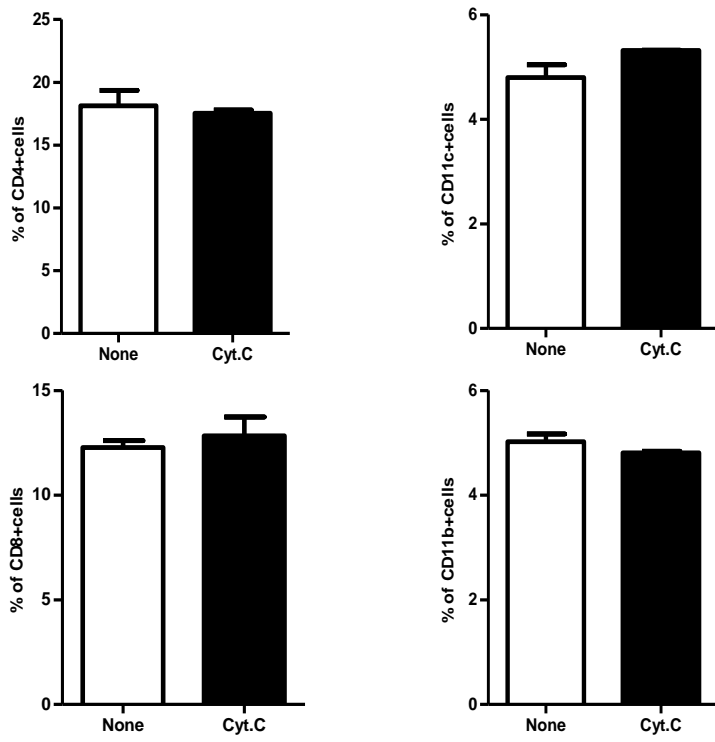

B

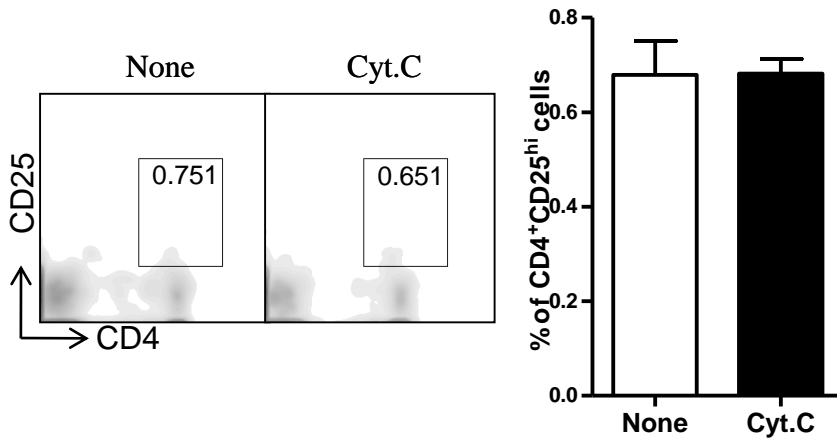

C

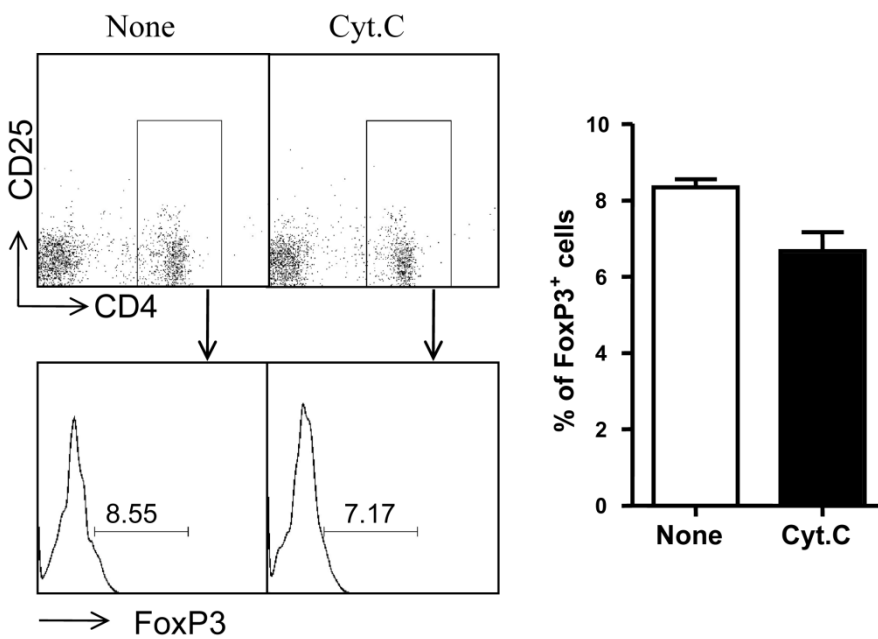

Figure S4

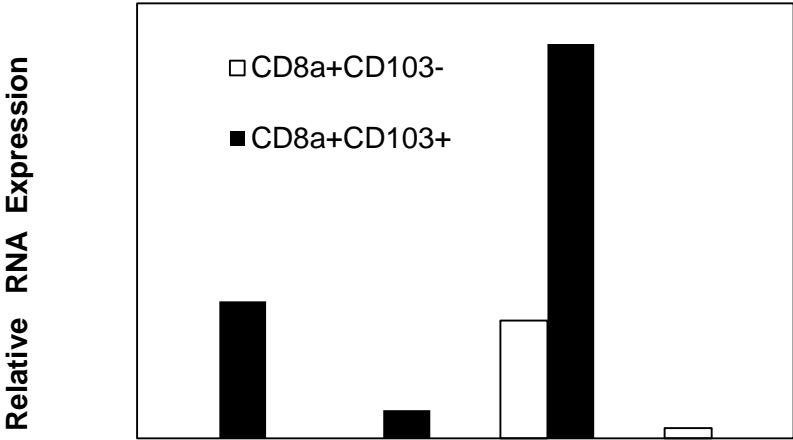

Figure S5

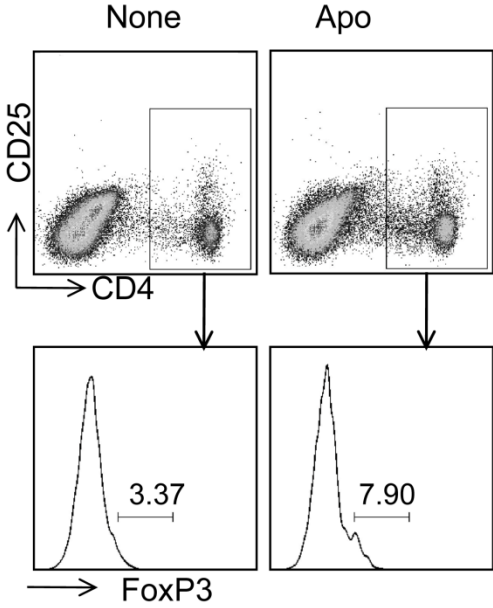

Percentage of FoxP3<sup>+</sup> cell in CD4 gated cells

Figure S6

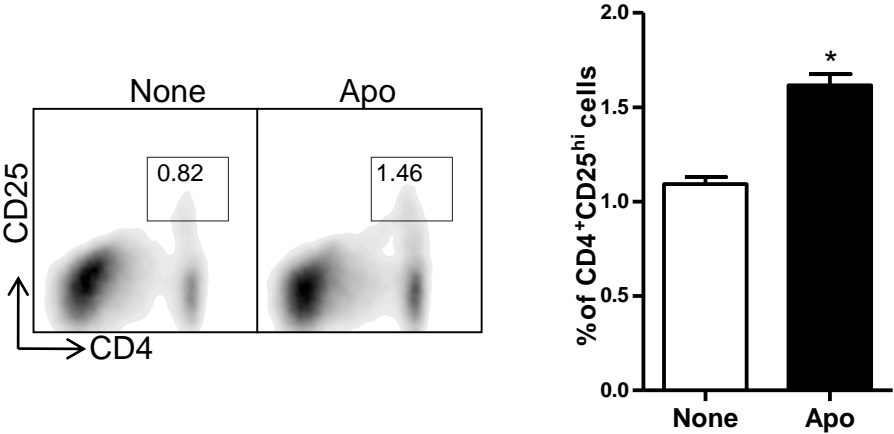

Figure S7

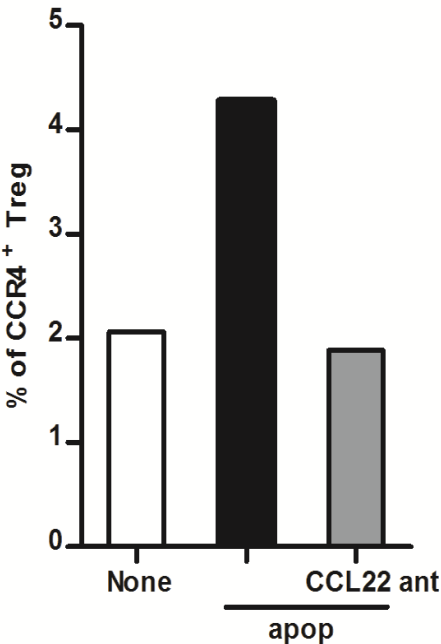

Figure S8

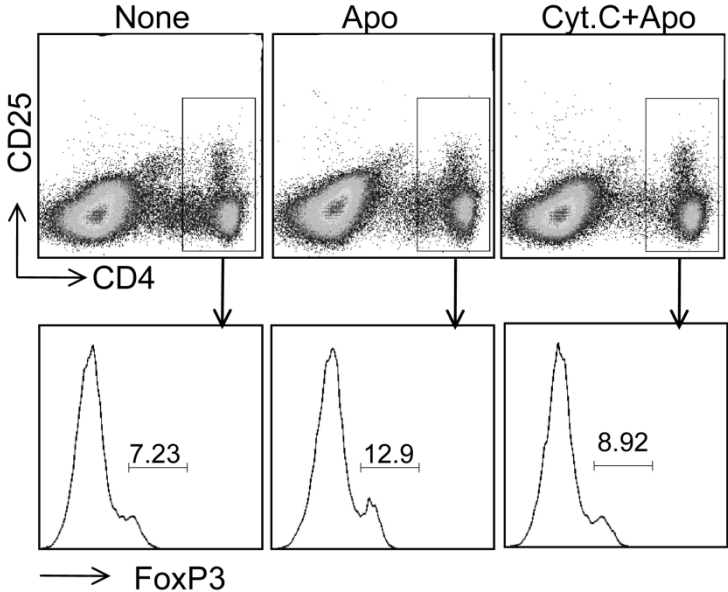

Supplement: IMM-148-174-s001.pdf [file IMM-148-174-s001.pdf]
